1        **Analysis of Polycerate Mutants Reveals the Evolutionary Co-option of**  
2        ***HOXD1* to Determine the Number and Topology of Horns in Bovidae**

3  
4    Aurélie Allais-Bonnet<sup>1,2,3#</sup>, Aurélie Hintermann<sup>4,#</sup>, Marie-Christine Deloche<sup>1,2,3</sup>, Raphaël  
5    Cornette<sup>5</sup>, Philippe Bardou<sup>6,7</sup>, Marina Naval-Sanchez<sup>8</sup>, Alain Pinton<sup>6</sup>, Ashleigh Haruda<sup>9</sup>, Cécile  
6    Grohs<sup>10</sup>, Jozsef Zakany<sup>4</sup>, Daniele Bigi<sup>11</sup>, Ivica Medugorac<sup>12</sup>, Olivier Putelat<sup>13,14</sup>, Ockert  
7    Greyvenstein<sup>15</sup>, Tracy Hadfield<sup>16</sup>, Slim Ben Jemaa<sup>17</sup>, Gjoko Bunevski<sup>18</sup>, Fiona Menzi<sup>19</sup>,  
8    Nathalie Hirter<sup>19</sup>, Julia M. Paris<sup>19</sup>, John Hedges<sup>20</sup>, Isabelle Palhiere<sup>6</sup>, Rachel Rupp<sup>6</sup>, Johannes  
9    A. Lenstra<sup>21</sup>, Louisa Gidney<sup>22</sup>, Joséphine Lesur<sup>23</sup>, Renate Schafberg<sup>9</sup>, Michael Stache<sup>9</sup>, Marie-  
10    Dominique Wandhammer<sup>24</sup>, Rose-Marie Arbogast<sup>25</sup>, Claude Guintard<sup>26,27</sup>, Amandine Blin<sup>28</sup>,  
11    Abdelhak Boukadiri<sup>10</sup>, Julie Riviere<sup>10,29</sup>, Diane Esquerré<sup>30</sup>, Cécile Donnadieu<sup>30</sup>, Coralie  
12    Danchin-Burge<sup>31</sup>, Coralie M Reich<sup>32</sup>, David Riley<sup>15</sup>, Este van Marle-Koster<sup>33</sup>, Noelle Cockett<sup>16</sup>,  
13    Benjamin J. Hayes<sup>34</sup>, Cord Drögemüller<sup>19</sup>, James Kijas<sup>8</sup>, Eric Pailhoux<sup>2,3</sup>, Gwenola Tossier-  
14    Klopp<sup>6</sup>, Denis Duboule<sup>4,35,36,\*</sup> and Aurélien Capitan<sup>1,10,\*</sup>

15

16    <sup>1</sup>ALLICE, 75012 Paris, France

17    <sup>2</sup>Université Paris-Saclay, UVSQ, INRAE, BREED, 78350, Jouy-en-Josas, France

18    <sup>3</sup>Ecole Nationale Vétérinaire d'Alfort, BREED, 94700, Maisons-Alfort, France

19    <sup>4</sup>Department of Genetics and Evolution, University of Geneva, 1211, Geneva 4, Switzerland

20    <sup>5</sup>Institut de Systématique, Evolution, Biodiversité (ISYEB), Muséum National d'Histoire  
21        Naturelle, CNRS, Sorbonne Université, EPHE, Université des Antilles, CP50, 75005 Paris,  
22        France

23    <sup>6</sup>GenPhySE, Université de Toulouse, INRAE, ENVT, F-31326, Castanet Tolosan, France

24    <sup>7</sup>INRAE, Sigenae, Castanet-Tolosan, France

25    <sup>8</sup>CSIRO Agriculture & Food, St. Lucia, 4067, QLD, Australia

26    <sup>9</sup>Central Natural Science Collections, Martin Luther University Halle-Wittenberg, 06108 Halle  
27        (Saale), Germany

28    <sup>10</sup>Université Paris-Saclay, INRAE, AgroParisTech, GABI, 78350 Jouy-en-Josas, France

29    <sup>11</sup>Dipartimento di Scienza e Tecnologia Agro-Alimentari, Alma Mater Studiorum University of  
30        Bologna, Bologna, Italy

31    <sup>12</sup>Population Genomics Group, Department of Veterinary Sciences, Ludwig-Maximilians-  
32        University Munich, Munich, Germany

33    <sup>13</sup>Archéologie Alsace, 67600 Sélestat, France

- 34 <sup>14</sup>UMR 7044 – ARCHIMEDE - Misha, 67083 Strasbourg, France
- 35 <sup>15</sup>Department of Animal Science, Texas A&M University, College Station, TX, 77843, USA
- 36 <sup>16</sup>Department of Animal, Dairy, and Veterinary Sciences, Utah State University, Logan, UT,  
37 84322-4700, USA
- 38 <sup>17</sup>Laboratoire des Productions Animales et Fourragères, Institut National de la Recherche  
39 Agronomique de Tunisie, Université de Carthage, Ariana, Tunisia
- 40 <sup>18</sup>Livestock Department, Faculty of Agricultural Sciences and Food Institute of Animal  
41 Biotechnology, University Ss. Cyril and Methodius, 1000 Skopje, North Macedonia
- 42 <sup>19</sup>Institute of Genetics, Vetsuisse Faculty, University of Bern, Bern, 3001, Switzerland
- 43 <sup>20</sup>Manx Loaghtan Sheep Breeders' Group, Spring Lane, Bassingbourn, Cambridgeshire, SG8  
44 5HT, UK
- 45 <sup>21</sup>Utrecht University, Faculty of Veterinary Medicine, Utrecht, Netherlands
- 46 <sup>22</sup>Rent a Peasant, Tow Law, Bishop Auckland, Durham County, DL13 4BB, UK
- 47 <sup>23</sup>Unité Archéozoologie, Archéobotanique, Sociétés Pratiques et Environnements (AASPE),  
48 CNRS, Muséum National d'Histoire Naturelle, 75005 Paris, France
- 49 <sup>24</sup>Musée Zoologique de Strasbourg, 67000 Strasbourg, France
- 50 <sup>25</sup>CNRS UMR 7044 – ARCHIMEDE - Misha, 67083 Strasbourg, France
- 51 <sup>26</sup> Unité d'Anatomie Comparée, Ecole Nationale Vétérinaire de l'Agroalimentaire et de  
52 l'Alimentation, Nantes Atlantique - ONIRIS, 44307 Nantes, France
- 53 <sup>27</sup>Groupe d'Études Remodelage osseux et bioMatériaux (GEROM), Université d'Angers, Unité  
54 INSERM 922, LHEA/IRIS-IBS, CHU d'Angers, 49100 Angers, France
- 55 <sup>28</sup>Muséum National d'Histoire Naturelle, CNRS, UMS 2700 2AD, CP 51,75005 Paris, France
- 56 <sup>29</sup> INRAE, Micalis Institute, AgroParisTech, Université Paris-Saclay, 78350 Jouy-en-Josas,  
57 France
- 58 <sup>30</sup>INRAE, US 1426, GeT-PlaGe, Genotoul, Castanet-Tolosan, France
- 59 <sup>31</sup>Institut de l'Élevage, 75012 Paris, France
- 60 <sup>32</sup> Agriculture Victoria, AgriBio, Centre for AgriBioscience, Bundoora, Victoria, Australia
- 61 <sup>33</sup>Department of Science, University of Pretoria, P/bag X20 Hatfield, 0028, South Africa
- 62 <sup>34</sup>Queensland Alliance for Agriculture and Food Innovation (QAAFI), Centre for Animal  
63 Science, University of Queensland, St. Lucia, QLD, 4072, Australia
- 64 <sup>35</sup>Swiss Cancer Research Institute, EPFL, Lausanne, Switzerland
- 65 <sup>36</sup>Collège de France, Paris, France
- 66 # These authors contributed equally to this work

68 \* Corresponding authors:

69 Aurélien Capitan

70 Université Paris-Saclay, INRAE, AgroParisTech, GABI, 78350 Jouy-en-Josas, France

71 [aurelien.capitan@inrae.fr](mailto:aurelien.capitan@inrae.fr)

72

73 Denis Duboule

74 Department of Genetics and Evolution, University of Geneva, 1211, Geneva 4, Switzerland

75 Swiss Cancer Research Institute, EPFL, Lausanne, Suisse

76 Collège de France, Paris, France

77 [denis.duboule@epfl.ch](mailto:denis.duboule@epfl.ch)

78

79 **Key words**

80 *Hox* genes, co-option, regulatory mutation, goat and sheep genomics

## 81 **Abstract**

82 In the course of evolution, pecorans (i.e. higher ruminants) developed a remarkable diversity of  
83 osseous cranial appendages, collectively referred to as ‘headgear’, which likely share the same  
84 origin and genetic basis. However, the nature and function of the genetic determinants  
85 underlying their number and position remain elusive. Jacob and other rare populations of sheep  
86 and goats, are characterized by polyceraty, the presence of more than two horns. Here, we  
87 characterize distinct *POLYCERATE* alleles in each species, both associated with defective  
88 *HOXD1* function. We show that haploinsufficiency at this locus results in the splitting of horn  
89 bud primordia, likely following the abnormal extension of an initial morphogenetic field. These  
90 results highlight the key role played by this gene in headgear patterning and illustrate the  
91 evolutionary co-option of a gene involved in the early development of bilateria to properly fix  
92 the position and number of these distinctive organs of Bovidae.

## 93 **Introduction**

94 In pecorans, successive environmental and behavioural adaptations favoured the emergence and  
95 sometimes the secondary loss of a variety of headgear, as exemplified by bovid horns, cervid  
96 antlers, giraffid ossicones or antilocaprid pronghorns (Davis et al. 2011; Wang et al. 2019). As  
97 different as they are, these iconic organs share both a common cellular origin and a minimal  
98 structural organisation: they derive from neural crest stem cells and consist of paired structures,  
99 located on the frontal bones and composed of a bony core covered by integument (Davis et al.  
100 2011; Wang et al. 2019) (**Fig. 1, Suppl. Fig. 1**). While the development and evolution of  
101 headgear is a long-standing question, the underlying molecular and cellular mechanisms have  
102 been difficult to study, mostly because the patterning and differentiation of headgear progenitor  
103 cells occur early during embryogenesis (Lincoln 1973; Allais-Bonnet et al. 2013) and involve  
104 hundreds of genes (Wang et al. 2019).

105 In this context, natural mutations affecting headgear number, shape or position, such as the  
106 polycerate (multi-horned) phenotype occurring in small ruminants (**Fig. 1a, b**, OMIA 000806-  
107 9940), offer a valuable alternative (Capitan et al. 2012). Polyceraty was already observed in the  
108 oldest ovine remains from Çatalhöyük, Turkey (ca 6000 BCE (Epstein 1971; Putelat 2005)) and  
109 this dominant phenotype currently segregates in several sheep breeds around the world. Even  
110 though the corresponding locus was mapped in seven distinct populations to the same region of  
111 chromosome 2 (Chr2), it has not yet been identified (Greyvenstein et al. 2016; He et al. 2016;  
112 Kijas et al. 2016; Ren et al. 2016). In contrast, polycerate goats are found only sporadically in

113 the Alps and have not been subject to any genetic studies thus far. The oldest record dates back  
114 from 1786, when the French Queen Marie-Antoinette imported a four-horned billy-goat from  
115 the city of Bulle, Switzerland to her model farm (Heitzmann 2006).

116 We set up to determine the genetic bases of these conditions in sheep and goats and, in this  
117 study, we show that polyceraty in Bovidae is due either to a four-base-pair deletion affecting  
118 the splicing of the *Hoxd1* gene in sheep, or to the deletion of a large regulatory region controlling  
119 the same gene, in goats. These results thus illustrate the evolutionary co-option of this gene  
120 normally involved in early development to help determine the position and number of horns.  
121 They also show that comparable phenotypes observed in distinct species and selected and  
122 maintained for a long time are caused by the mis-regulation of the same gene.

## 123 **Results and Discussion**

### 124 **Characterisation of *POLYCERATE* Mutations in Sheep and Goats**

125 To identify the molecular determinants of polyceraty, we re-analysed the Illumina OvineHD  
126 Beadchip genotyping data (600 k SNPs) of 111 case and 87 control sheep generated by two  
127 previous studies (Greyvenstein et al. 2016; Kijas et al. 2016) (**Suppl. Tables 1 and 2**).  
128 Assuming autosomal dominant inheritance and genetic homogeneity in the three breeds  
129 investigated, we fine-mapped the ovine *POLYCERATE* locus between positions 132,717,593  
130 and 133,151,166 -bp on Chr2 (**Suppl. Fig. 2**). By comparing whole genome sequences of 11  
131 polycerate specimens and 1'179 controls representing the world-wide sheep diversity, we  
132 identified a single candidate variant in this interval: a four-nucleotide deletion located at  
133 position +4 to +7 bp after exon 1 of the *HOXD1* gene (g.132,832,249\_132,832,252del; **Fig. 1c**).  
134 Genotyping of this variant in 236 animals from eight populations containing polycerate  
135 specimens showed a perfect genotype to phenotype association (**Suppl. Tables 3 and 4**).  
136 Moreover, cross-species alignments revealed that the +4 and +5 nucleotides are conserved  
137 amongst 103 sarcopterigian and tetrapod species, supporting an important role in the splicing  
138 of *HOXD1* precursor RNAs (**Fig. 1c and Suppl. Table 5**).

139 We next mapped the caprine *POLYCERATE* locus to a 542 kb large region orthologous to that  
140 of the ovine locus (Chr2:115,143,037-115,685,115 bp on ARS1 assembly (Bickhart et al.  
141 2017); **Suppl. Fig. 2**), by using a panel of 35 polycerate and 51 two-horned goats obtained from  
142 eight European populations and genotyped with the Illumina GoatSNP50 BeadChip (Tosser-  
143 Klopp et al. 2014) (**Suppl. Table 6**). Within this interval, we identified 36 private heterozygous  
144 variants in one heterozygous polycerate goat *versus* 1'160 control individuals (**Suppl. Table**

145 7). Genotyping of five case-control pairs from distinct breeds reduced the list of candidates to  
146 15 short variants, affecting genomic regions not conserved amongst 103 eutherian mammals,  
147 as well as a rare type of structural variation located 57 kb downstream of the *HOXD1* 3'UTR  
148 (**Suppl. Tables 7 and 8**). The latter involved the translocation of 137 kb from Chr5 to Chr2 by  
149 means of a circular intermediate (Durkin et al. 2012) and the deletion of 503 kb from the  
150 insertion site (g.115,652,290\_116,155,699delins137kb; **Fig. 1d, e** and **Suppl. Fig. 3**).  
151 Consequently, the mutant chromosome lacked the *MTX2* gene and carried an exogenic copy of  
152 both *RASSF3* and the first ten exons of *GNS*. Genotyping of this variant in 77 case and 355  
153 control goats originating from 24 distinct populations revealed a 100 percent association  
154 between polyceraty and heterozygosity for the large insertion/deletion (**Suppl. Table 9** and  
155 **Suppl. Fig. 4**). Homozygous mutants were not detected in our panel, whereas at least 14  
156 polycerate animals were born from polycerate pairs of parents (binomial  $p = 3.4 \times 10^{-3}$ ; **Suppl.**  
157 **Note 1**). Because the knockdown of *Mtx2* in zebrafish is embryonic lethal at gastrulation  
158 (Wilkins et al. 2008) and newborn mice homozygous for a deletion including *Mtx2* were never  
159 scored (binomial  $p = 5.7 \times 10^{-6}$ ; **Suppl. Note 1**), we concluded that homozygosity at the goat  
160 *POLYCERATE* locus is an early lethal condition.

### 161 **Remote *Hoxd1* regulation in Transgenic Mice**

162 These mapping studies identified the *HOXD* gene cluster as being involved in the polycerate  
163 phenotype in both sheep and goats. This cluster contains nine homeobox genes encoding  
164 transcription factors involved in the organisation of the body plan during embryogenesis  
165 (Krumlauf 1994). Both their timing of activation and their domains of expression are  
166 determined by their respective positions along the gene cluster (Kmita and Duboule 2003).  
167 Accordingly, the mouse *Hoxd1* gene is expressed very early on and in the most rostral part of  
168 the embryo (**Fig. 2a**). In rodents, *Hoxd1* is expressed in crest cell-derived head structures  
169 (Frohman and Martin 1992), which made this gene a particularly interesting candidate for  
170 polyceraty. Also, a DNA sequence conserved only amongst pecorans species carrying headgear  
171 was identified 15 kb downstream of *HOXD1* ("HCE" in (Wang et al. 2019)). This sequence,  
172 however, is not included in the large insertion-deletion observed in polycerate goats.

173 We assessed whether the deletion present in goat may impact the expression of *HOXD1* in  
174 cranial crest cells by looking at a series of modified mouse strains either carrying transgenes or  
175 where a targeted deletion was induced at the orthologous locus (see Methods). First, the wide  
176 presence of cells expressing *Hoxd1* both in the face and in the cranial derma, the latter being of  
177 crest cell origin, was detected in fetuses with a targeted integration of lacZ sequences into the

178 *Hoxd1* gene (**Fig. 2b**, *Hoxd1<sup>Lac</sup>*). Expression was however not scored in the crown region (**Fig.**  
179 **2b**, dashed circle), the area corresponding to that of horn bud differentiation in Bovidae (Dove  
180 1935; Capitan et al. 2011). Instead, *Hoxd1* was expressed abundantly in other regions of the  
181 head including the eyelids (**Fig. 2b**, white arrow and arrowhead), an observation consistent with  
182 the abnormal upper eyelids and eyebrows often detected in ovine and caprine polycerate  
183 animals (**Suppl. Fig. 5-7**).

184 We next tried to localize the underlying regulatory elements by using transgenic BACs with  
185 lacZ sequences introduced within *Hoxd1*. A BAC covering the *HoxD* cluster itself did not show  
186 any expression in the head, suggesting that regulatory sequences are not located in the gene  
187 cluster (**Fig. 2b**, *TgBAC<sup>HoxD</sup>*). In contrast, a transgenic BAC extending in the region upstream  
188 of *Hoxd1* and including *Mtx2* gave a staining similar to *Hoxd1<sup>Lac</sup>* (**Fig. 2b**, *TgBAC<sup>Mtx2</sup>*),  
189 indicating that regulatory sequences were located upstream *Hoxd1*, in a region including and  
190 surrounding *Mtx2*. The latter result was controlled by using an engineered 151 Kb deletion of  
191 a largely overlapping region, including a lacZ reporter gene, which expectedly abrogated *Hoxd1*  
192 expression in cranial cellular populations (**Fig. 2b**, *HoxD<sup>Del(151kb)lac</sup>*). As a positive control for  
193 the lacZ reporter system, expression of *Hoxd1* in neural derivatives driven by sequences within  
194 the *HoxD* cluster was scored, as expected (**Fig. 2b**, black arrows). These analyses in mice  
195 demonstrated that regulatory sequences driving *Hoxd1* expression in the head are located in a  
196 region largely comprised within the deletion determined in goats as causative of polyceraty,  
197 further suggesting that the latter deletion abrogates *HOXD1* expression in goat fetuses.

### 198 **Expression of *HOXD1* in Pecoran Fetuses**

199 To investigate whether the absence of mouse *Hoxd1* expression in the crown region of the head  
200 was also observed in Pecoran embryos, we isolated heterozygous polycerate and wild type  
201 fetuses both at 70 dpc (days *post-coitum*) in goat and at 76 dpc in sheep, two stages where  
202 eyelids are fully grown and horn buds can be distinguished (**Suppl. Fig. 8**). After micro-  
203 dissection and Reverse Transcription quantitative PCR (RT-qPCR), we noticed that in wild type  
204 fetuses of both species, *HOXD1* expression was significantly lower in horn buds than in  
205 surrounding tissues (**Fig. 3a, b**), reminiscent of the weak -if any- expression of *Hoxd1* observed  
206 in a comparable region in the mouse. In heterozygous mutant goat fetuses, however, *HOXD1*  
207 RNA levels were equally low in all three samples (**Fig. 3a**), re-enforcing the idea that the  
208 caprine *POLYCERATE* variant negatively affects the expression of *HOXD1*.

209 In sheep, despite some variation due to slight differences in sampling (**Fig. 3b**, upper histogram  
210 and methods), heterozygous mutants for the four-base-pair deletion adjacent to the splice donor  
211 site displayed RNA amounts roughly similar to control specimens when primers targeting the  
212 second exon of the gene were used. However, RT-qPCR with intronic primers revealed  
213 significant intron retention in all mutant tissues but horn buds, where expression was likely too  
214 low (**Fig. 3b** lower histogram). Intron retention is predicted to result in a non-functional protein,  
215 truncated two residues after the last amino acid encoded by exon 1 and thus lacking the DNA  
216 binding peptide (**Suppl. Fig. 9**). Therefore, both *POLYCERATE* variants appear to reduce the  
217 amount of functional *HOXD1* RNAs in the horn bud region, likely leading to a loss of boundary  
218 condition and an extension of the cellular field permissive for horn bud development. This  
219 extension would elongate the bud region sufficiently to split it into two separate organs.

## 220 **Morphometric Analyses and Topology of the Horn Field**

221 To substantiate this hypothesis, we analysed variations in horn topology in 61 ovine and 19  
222 caprine skulls from various populations using 3D geometric morphometrics (**Suppl. Table 10**).  
223 We performed Principal Component Analysis (PCA) using 116 landmarks and sliding semi-  
224 landmarks after removing non-shape variation (see Methods). We then plotted the first principal  
225 components (PCs) to visualize the specimen distribution in the morphospace (**Fig. 4a**, **Suppl.**  
226 **Fig. 10-12** and **Suppl. Table 11**). The first two axes represented 35.8% and 23.3% of the total  
227 variance and distinguished the phenotype and species categories, respectively. Along the first  
228 axis, we individualized three sub groups of polycerate specimens in sheep, based on the  
229 distances between lateral horns (dlh, **Fig. 4a**). Of note, the group displaying the largest dlh (i.e.  
230 that with the most negative values along the x axis) had no equivalent in goat, possibly due to  
231 early lethal homozygosity (see above).

232 We looked at the association between genotypes and horn implantation within polycerate  
233 animals by measuring the distances both between the lateral horns on the left side of the skull  
234 (dlhl) and between the upper horns (duh) in 29 rams (**Suppl. Table 12**). We found a significant  
235 difference in the proportions of homozygous and heterozygous specimens in animals with  
236  $dlhl \leq duh$  versus  $dlhl > duh$  (**Fig. 4b**) and no heterozygous animal was found to have  $dlhl > duh$ .  
237 We computed the theoretical skull shape at the maximum and minimum of PC1 axis (**Fig. 4c**)  
238 and the corresponding vectors of deformation (**Fig. 4d**). The results obtained were consistent  
239 with a splitting of horn buds in polycerate animals. This splitting always occurred along the  
240 major axis of the ellipse formed by the wild type horn bud, with an extension of the hemi-horn  
241 buds in an area where *HOXD1* expression was detected in wild type specimens (**Fig. 4d** and



242 above). In homozygous animals, the new cellular field was likely larger than in heterozygous,  
243 leading to a clearer separation of hemi-horns, whereas heterozygous specimens often displayed  
244 partially fused organs. This is markedly different from the production of additional horns, as  
245 observed in subspecies of *Tetracerus quadricornis* (Groves 2003) (**Suppl. Fig. 13**).

## 246 **Conclusions**

247 From these results, we conclude that pecorans have an intrinsic capacity to induce hornbuds  
248 within a presumptive head territory. This capacity appears to be associated with the non-  
249 expression of the *HOXD1* transcription factor, which is present in surrounding cells and may  
250 delimit this field, a function somewhat distinct from the ancestral role of *Hox* genes during  
251 development (Krumlauf 1994). Various haploinsufficient conditions lead to the extension of  
252 this territory, a condition fully achieved in complete absence of *HOXD1*. While a weak  
253 extension of this morphogenetic field leads to the growth of twin horns, fused at their bases, a  
254 full extension induces the complete splitting of the horn bud, thus generating a pair of lateral  
255 horns. We hypothesize that the initial expression of *HOXD1* in anterior crest cells made this  
256 evolutionary co-option possible and thus helped to determine the position and number of horns,  
257 which became the distinctive trait of Bovidae.

## 258 **Materials and Methods**

### 259 **Ethics Statement**

260 All experiments reported in this work comply with the ethical guidelines of both the French  
261 National Research Institute for Agriculture, Food and Environment (INRAE) and the  
262 University of Geneva, Switzerland. Blood samples were collected on sheep and goats during  
263 routine blood sampling (for annual prophylaxis, paternity testing or genomic selection purpose)  
264 by trained veterinarians and following standard procedures and relevant national guidelines.  
265 Sample collection of small ruminants in Switzerland was approved by the Cantonal Committee  
266 for Animal Experiments (Canton of Bern; permit 75/16). Ovine and caprine fetuses were  
267 produced in an INRAE experimental farm (Bressonvilliers, France) and collected in the INRAE  
268 experimental slaughterhouse of Jouy-en-Josas (France). Experiments were performed in strict  
269 accordance with the European directive 2010/63/UE and were approved by the local  
270 Institutional Animal Care and Use Committee of AgroParisTech/INRAE (COMETHEA,  
271 permit number 19/032). All experiments with mice were performed in agreement with the Swiss  
272 law on animal protection (LPA), under license No GE 81/14 (to D.D.). All the samples and data

273 analyzed in the present study were obtained with the permission of breeders, breeding  
274 organizations and research group providers.

## 275 **Animals**

276 Live sheep and goats. Sheep and goats from a wide diversity of breeds around the world were  
277 involved in at least one of the analyses performed in this study. Briefly, they fell into four  
278 categories: 1) animals genotyped with Illumina OvineHD or GoatSNP50 (Tosser-Klopp et al.  
279 2014) BeadChip for mapping the *POLYCERATE* locus in both species (**Supplementary Tables**  
280 **1 and 6**); 2) a set of whole genome sequences used for identifying and filtering candidate  
281 mutations (**Supplementary Table 13**); 3) animals genotyped by PCR and Sanger sequencing  
282 for candidate mutations (**Supplementary Tables 3 and 7**); and 4) polycerate sheep animals  
283 genotyped for verifying putative differences between heterozygous and homozygous  
284 individuals in terms of distances between the lateral horns and between the upper horns  
285 (**Supplementary Table 12**).

286 Mouse models. Five different transgenic mouse stocks were used (see **Supplementary Table**  
287 **14**). The *HoxD*<sup>(*Del365*)</sup> allele was produced by CRISPR-Cas9 technology. sgRNAs were designed  
288 manually, ordered as DNA oligos at Eurogentec and cloned into px330. sgRNAs were  
289 synthesized with HiScribe T7 high yield RNA synthesis kit (New England Biolabs), incubated  
290 together with Cas9 mRNA and then electroporated into fertilized mouse zygotes (see also  
291 **Supplementary Note 1**). The *HoxD*<sup>(*Del151*)</sup> allele was obtained by using CRE-mediated  
292 recombination (Andrey et al. 2013). The Transgenic fetuses from four strains containing  
293 different lacZ constructions were collected from stage E12.5 to E.15.5. The *Hoxd1*<sup>Lac</sup> strain was  
294 obtained by inserting a LacZ cassette in the HindIII site of the second exon of *Hoxd1* (Zakany  
295 et al. 2001). The BAC<sup>HoxD</sup> and BAC<sup>Mtx2</sup> result from the introduction of a LacZ-SV40promoter-  
296 *Hoxd1*-zeocin cassette in the HindIII site of the second exon of *Hoxd1* (Schep et al. 2016).  
297 These BACs were selected based on their localization on the physical map of the mouse genome  
298 (Gregory et al. 2002) and obtained from the RPCI-23 and -24 Mouse (C57BL/6J) BAC  
299 Libraries from the Children's Hospital Oakland Research Institute  
300 (<https://bacpacresources.org/libraries.php>). The modified BACs were purified, linearised and  
301 microinjected into mouse fertilised oocytes to obtain each of these strains in mixed Bl6XCBA  
302 hybrid background, by standard procedures. Gene expression analyses were performed on  
303 heterozygous specimens.

304 A precise map of the orthologous *Hoxd* region in mouse and goat was obtained by aligning on  
305 murine GRCM38/mm10 genome assembly the BAC end sequences and goat genome sequences  
306 of 10 kb segments encompassing the breakpoints of the large insertion-deletion. Alignments  
307 were carried out using the BLAT tool from the UCSC Genome Browser  
308 (<http://genome.ucsc.edu/cgi-bin/hgBlat>).

309 Animals subject to post-mortem clinical examination. The eyelids and eyes fundus were  
310 examined in a 3-weeks old polycerate male Provençale kid who died from a natural cause and  
311 a matched control, as well as in an 8-year old polycerate Jacob ewe and her wild type half-sister  
312 after slaughter.

313 Ovine and Caprine fetuses were generated by mating heterozygous polycerate males of the  
314 caprine Provençale and ovine Jacob breeds with wild type cull females, after oestrus  
315 synchronization. Oestrus cycles were synchronized using intravaginal sponge impregnated with  
316 progestagen for 15 days followed by PMSG (Pregnant Mare Serum Gonadotropin) injection 48  
317 h after sponge removal. Pregnant females were anaesthetized by electronarcosis and euthanized  
318 by immediate exsanguination on day 70 or 76 *post-coitum* in the INRAE slaughterhouse of  
319 Jouy-en-Josas (France). Directly after, the fetuses were recovered from their genital tracts and  
320 exsanguinated. ‘Skin’ samples comprising the epidermis, dermis and hypodermis were  
321 collected at different locations on the left side of the head of the 70 dpc goat and 76 dpc sheep  
322 fetuses (see **Fig. 3**) for expression studies. Of note, the skin of the back of the head was sampled  
323 slightly more caudally in polycerate animals due to the specific localization of the posterior pair  
324 of horns. The same skin samples were collected on the right side of the head with the underlying  
325 bone for histological analyses. Four case fetuses and four controls of matched sex were selected  
326 in each species for expression studies. Finally, for verification, liver samples were also collected  
327 for DNA extraction and subsequent genotyping of the fetuses for the sheep and goat  
328 *POLYCERATE* mutations.

329 Skull specimens. The skulls from 61 sheep (32 polycerate, 29 wild type) and 19 goats (12  
330 polycerate, 7 wild type) were obtained from different anatomical collections. These specimens  
331 were sampled over the last 170 years and originate from a wide variety of populations.  
332 Information on horn phenotype, species, gender, age, population or breed, collection, and year  
333 of entry in the collection are presented in **Supplementary Table 10**.

### 334 **Phenotyping**

335 The polycerate phenotype is an autosomal dominant trait readily visible on fetuses at 70 dpc in  
336 goat and 76 dpc in sheep (**Supplementary Fig. 8**). Phenotyping at birth is difficult due to the  
337 presence of hairs and it is necessary to wait for after the first month to distinguish horns growing  
338 amid fur. In polycerate animals, horns have a nearly circular cross section but, depending on  
339 their relative placement, they may progressively fuse at the base with other horns located on  
340 the same side of the skull. The growth in width of horns is expected to affect the measure of  
341 distances between the lateral horns (dlh) and the upper horns (duh) but not their relative sizes.  
342 This, together with the fact that we never observed any case of fusion between the upper horns  
343 led us to consider the dlh/duh ratio on the left side of the head to distinguish different types of  
344 four-horned animals in one of the analyses performed in this study. Polyceraty is frequently  
345 associated with defects of the eyelid in both species. While we did not systematically record  
346 this particular phenotype, we performed *post-mortem* clinical examination of the eyelids and  
347 eyebrows in one case and one control animal per species (**Supplementary Fig. 5-7**).

#### 348 **DNA Extraction**

349 Ovine and caprine DNAs were extracted from hair root, blood or liver samples using the  
350 DNeasy Blood and Tissue Kit (Qiagen). Murine DNA was isolated from ear snip after  
351 Proteinase K digestion using standard phenol/chloroform protocol. DNA quality was controlled  
352 by electrophoresis and quantified using a Nanodrop spectrophotometer (Thermo Scientific).

#### 353 **IBD-Mapping of Caprine and Ovine *POLYCERATE* Loci**

354 General principle. Assuming autosomal dominant inheritance and genetic homogeneity in each  
355 of the species investigated, all polycerate animals share at least one copy of the same causative  
356 mutation and of a surrounding chromosomal segment inherited-by-descent from a common  
357 ancestor. Therefore, comparing SNP array genotyping data of two distantly related polycerate  
358 animals is expected to reveal a number of Mendelian incompatibilities (i.e. homozygosity for  
359 different alleles) throughout their genomes but not within shared IBD segments. Accordingly,  
360 we screened Mendelian incompatibilities in all the possible pair combinations of polycerate x  
361 polycerate (4H4H pairs) and polycerate x wild type (4H2H) individuals. Pairs with a proportion  
362 of Mendelian incompatibilities below 1 percent of the total number of markers tested were  
363 declared as constituted of parent and offspring and were not considered in the analysis. Then,  
364 for sliding windows of n markers (n set to 10 in goat and 50 in sheep considering differences  
365 in marker density) we scored the numbers of 4H4H pairs and 4H2H pairs for which ‘no’ versus

366 'at least one' Mendelian inconsistency has been recorded. Finally, we compared the  
367 contingency tables produced using Fisher's exact test.

368 SNP array genotypes, sample and variant pruning. Illumina GoatSNP50 BeadChip genotypes  
369 specifically generated for this research and Illumina OvineHD Beadchip genotyping data  
370 generated by two previous studies<sup>8,10</sup> were considered in the analyses. Polled (i.e hornless)  
371 animals were removed from the sheep dataset. Markers with a minor allele frequency below  
372 5% or which were called in less than 95 % of the samples were eliminated. Moreover, in sheep,  
373 genotyping data were extracted for markers located in a 10 Mb region (Chr2:127,500,001-  
374 138,500,000) corresponding approximately to the *HOXD* gene cluster +/- 5 Mb and  
375 encompassing all the mapping intervals of the *POLYCERATE* locus reported in the literature  
376 (Greyvenstein et al. 2016; He et al. 2016; Kijas et al. 2016; Ren et al. 2016). The final datasets  
377 contained 111 cases, 87 controls and 2'232 markers in sheep and 35 cases, 51 controls and  
378 48'345 markers in goat.

### 379 **Analysis of Whole-Genome Sequences**

380 *Whole-genome sequences.* The genomes of one polycerate Provençale goat and one polycerate  
381 Jacob sheep were sequenced specifically for this study. Both were born from polycerate X wild  
382 type crosses and thus were predicted to be heterozygous for the caprine and ovine causative  
383 variants, respectively. Paired-end libraries with a 450 bp (goat) and 235 bp (sheep) insert size  
384 were generated using the NEXTflex PCR-Free DNA Sequencing Kit (Biooscientific). Libraries  
385 were quantified with the KAPA Library Quantification Kit (Cliniscience), controlled on a High  
386 Sensitivity DNA Chip (Agilent) and sequenced on a HiSeq 2500 (with 2\*100 bp read length in  
387 goat) and a HiSeq 3000 (with 2\*150 bp read length in sheep). The average sequence coverage  
388 was 16.7 and 11.1 x, for the polycerate goat and sheep individuals, respectively. Additional  
389 whole-genome sequences available in public databases were also considered in the analyses.  
390 These consisted of FASTQ files (for 10 additional case and 341 control sheep) and of VCF files  
391 (for 1160 goat and 838 sheep control individuals) generated by previous studies (see  
392 **Supplementary Table 13**). When necessary, the NCBI Genome Remapping Service  
393 (<https://www.ncbi.nlm.nih.gov/genome/tools/remap>) was used to convert positions in VCF  
394 files between older and most recent versions of genome assemblies.

395 *Read alignment, variant calling and filtering for candidate variants.* The sequence reads from  
396 FASTQ files were mapped on goat ARS1 ([https://www.ncbi.nlm.nih.gov/assembly/GCF\\_001704415.1/](https://www.ncbi.nlm.nih.gov/assembly/GCF_001704415.1/)) and sheep Oar\_v4.0 ([https://www.ncbi.nlm.nih.gov/assembly/GCF\\_000298735.2](https://www.ncbi.nlm.nih.gov/assembly/GCF_000298735.2))

398 genome assemblies using the BWA-MEM software v 0.7.17 with default parameters (Li and  
399 Durbin 2009) and converted to bam format with v 1.8 of SAMtools (Li et al. 2009). Duplicate  
400 reads were marked using Picard tools v 2.18.2 MarkDuplicates option  
401 (<http://broadinstitute.github.io/picard>) and base quality recalibration and indel realignments  
402 were done with v 3.7 of GATK (McKenna et al. 2010). Reads located in the mapping intervals  
403 of the ovine and caprine *POLYCERATE* loci +/- 1 Mb were extracted using SAMtools view  
404 option before processing to the calling of SNPs and small indels with GATK-HaplotypeCaller  
405 in ERC mode. The minimum read mapping quality and phred-scaled confidence threshold were  
406 set to 30 for each sample ('-stand\_call\_conf 30.0 -mmq 30 -ERC GVCF -variant\_index\_type  
407 LINEAR -variant\_index\_parameter 128000'). In goats we retained only heterozygous variants  
408 found in the heterozygous polycerate individual and absent from 1160 control animals, while  
409 in sheep we focused our attention on variants which were shared (either in heterozygous or  
410 homozygous state) in all the 11 polycerate sheep (1 Jacob and 10 Sishui Fur Sheep) and absent  
411 from the 1179 control animals. Finally, to ensure that we did not miss any candidate variants,  
412 we performed a detection of structural variants in the same regions using Pindel (Ye et al. 2009)  
413 and a visual examination of the whole genome sequences for 11 goats (1 case, 10 controls) and  
414 22 sheep (11 cases and 11 controls) using IGV (Thorvaldsson et al. 2013). The count  
415 command in IGVtools was used to produce '.tdf' files and identify changes in read coverage in  
416 the intervals investigated (with parameters: zoom levels = 10, window function = mean,  
417 window size = 1000, and extension factor = 500).

#### 418 **Definition of the Boundaries of the 503 kb Deletion-137 kb Insertion in Goat**

419 The boundaries of variant g.115,652,290\_116,155,699delins137kb were reconstructed  
420 manually using split read and paired-end read information obtained from IGV. Sequences of  
421 reads affected by the mutation were extracted from the .bam file using linux command lines  
422 and aligned manually to reconstruct the nucleotide sequence at each fusion point. For  
423 verification, amplicons encompassing these fusion points were PCR amplified in a  
424 Mastercycler pro thermocycler (Eppendorf) using Go-Taq Flexi DNA Polymerase (Promega),  
425 according to the manufacturer's instructions and primers listed in **Supplementary Table 15**.  
426 Amplicons were purified and bidirectionally sequenced by Eurofins MWG (Hilden, Germany)  
427 using conventional Sanger sequencing.

#### 428 **Genotyping of DNA Sequence Variants**

429 SNP and small Indels were genotyped using PCR and Sanger sequencing as described above.  
430 PCR primers were designed with Primer3 software (Rozen and Skaletsky 1999) and variants  
431 were detected using NovoSNP software (Weckx et al. 2005). Transgene insertions and large  
432 insertion-deletion were genotyped by PCR and electrophoresis on a 2% agarose gel. Ovine  
433 variant g.132,832,249\_132,832,252del was genotyped with primers  
434 TTTGGGGCCACACTAGAATC and CCTAGAGGGGGCCTACGAG while caprine and  
435 murine variants were genotyped with the primers listed in **Supplementary Table 7** and **14**  
436 respectively.

#### 437 **Analysis of Nucleotide Sequence Conservation at the *HOXD1* Exon 1–Intron-1 Junction**

438 Nucleotide sequences of the *HOXD1* gene in 103 sarcopterygian and tetrapod species were  
439 obtained from the Ensembl (<http://www.ensembl.org/index.html>; release 98) and UCSC  
440 (<http://genome.ucsc.edu/>) genome browser databases. The localization of the nucleotide  
441 sequence (between *MTX2* and *HOXD3*) was verified in each genome assembly to avoid possible  
442 confusion with paralogs. In addition, only one sequence was arbitrarily retained when genome  
443 assemblies for distinct individuals of the same species were available. Then sequences were put  
444 in the same orientation and trimmed to get 40 nucleotides before and 20 nucleotides after the  
445 splice donor site of *HOXD1* exon 1. A multispecies alignment was generated with ClustalW  
446 software (Thompson et al. 1994), version 2.1 (<https://www.genome.jp/tools-bin/clustalw>) and  
447 a sequence logo was generated using WebLogo (Crooks 2004) (<http://weblogo.berkeley.edu/>).  
448 Information on species, sequence and genome assemblies are presented in **Supplementary**  
449 **Table 5**.

#### 450 **Fluorescence *In Situ* Hybridization in Goat**

451 Skin biopsies were sampled from one heterozygous polycerate and one wild-type fetuses.  
452 Fibroblast cultures and metaphases were obtained according to (Ducos et al. 2000). Nucleotide  
453 sequences from the segments of caprine chromosomes 2 and 5 involved in the candidate  
454 causative mutation were aligned against bovine bacterial artificial chromosome (BAC) end  
455 sequences using BLAST (<http://blast.ncbi.nlm.nih.gov/Blast.cgi>). Two INRA BAC clones  
456 (Eggen et al. 2001) were selected and obtained from the Biological Resources of @BRIDGE  
457 facilities ([abridge.inrae.fr](http://abridge.inrae.fr)): INRAb 230B11, targeting the segment deleted on Chr2, and INRAb  
458 348A12, targeting the region of Chr5 that is duplicated and inserted on Chr2. FISH experiments  
459 were carried out according to (Yerle et al. 1994). The two BACs were labeled with biotin and  
460 digoxigenin, respectively, using the BioPrime DNA Labeling System kit (Life Technologies,

461 Carlsbad, CA, USA). Finally, they were revealed by Alexa 594 conjugated to streptavidin  
462 (Molecular Probes, Eugene, OR, USA) and FITC conjugated mouse anti-digoxygenin  
463 antibodies (Sigma, St Louis, MO).

#### 464 **Histological Analyses**

465 Tissues were fixed in paraformaldehyde (4%) for 24 h at +4°C. Samples were subsequently  
466 dehydrated in a graded ethanol series, cleared with xylene and embedded in paraffin wax.  
467 Microtome sections (5 µm, Leica RM2245) were mounted on adhesive slides (Klinipath- KP-  
468 PRINTER ADHESIVES), deparaffinized, and stained with haematoxylin, eosin and saffron  
469 (HES). Slides were scanned with the Panoramic Scan 150 (3D Hitech) and analyzed with the  
470 CaseCenter 2.9 viewer (3D Hitech).

#### 471 **Quantitative RT-PCR**

472 RNA was extracted using the RNeasy Mini Kit (Qiagen). Super-Script II (Invitrogen) was used  
473 to synthesize cDNA from 2 µg of total RNA isolated from each tissue sampled in 70 dpc goat  
474 and 76 dpc sheep fetuses. Gene sequences were obtained from Ensembl v92  
475 ([www.ensembl.org](http://www.ensembl.org)) and PCR primers (**Supplementary Table 16**) were designed using Primer  
476 Express Software for Real-Time PCR 3.0 (Applied Biosystems). Primer efficiency and  
477 specificity were evaluated on genomic DNA in each species. Quantitative PCR was performed  
478 in triplicate with 2 ng of cDNA using the Absolute Blue SYBR Green ROX mix (Thermo Fisher  
479 Scientific) and the StepOnePlus Real-Time PCR System (Applied Biosystems). The expression  
480 stability of five genes (*RPLP0*, *GAPDH*, *H2AFZ*, *YWHAZ* and *HPRT1*) was tested at each time  
481 point using the GeNorm program (Vandesompele et al. 2002) to identify appropriate qRT-PCR  
482 normalizing genes. Three normalizing genes (*GAPDH*, *H2AFZ* and *HPRT1*) were retained and  
483 the results were analyzed with qBase software (Hellemans et al. 2007).

#### 484 **Evaluation of the Consequences of Intron Retention Due to the 4 bp Deletion in *HOXD1*** 485 **intron 1**

486 The complete nucleotide sequence of ovine *HOXD1* gene was obtained from Ensembl v97. A  
487 mutant mRNA characterized by (i) a retention of intron 1 and (ii) a deletion of nucleotides  
488 located at position +4 to +7 bp after the end of exon 1 was designed. This mutant mRNA was  
489 translated using ExPASy Translate tool (<https://web.expasy.org/translate/>). Information on  
490 *HOXD1* functional domains was obtained from UniProt Knowledgebase  
491 (<https://www.uniprot.org/uniprot/W5Q7P8>).

492



### 493 **3D Geometric Morphometrics**

494 *Three-dimensional models.* Three-dimensional models were generated for 80 skulls consisting  
495 of 32 polycerate and 29 wild type sheep specimens as well as 12 polycerate and 7 wild type  
496 goat specimens (for information on skulls and reconstruction methods see **Supplementary**  
497 **Table 10**). Most of the 3D models (n=47) were reconstructed using a Breuckmann StereoScan  
498 structured light scanner and its dedicated software OptoCat (AICON 3D systems, Meersburg,  
499 Germany). Twenty-nine skulls were digitized with the Artec Eva structured-light scanner and  
500 ScanStudioHD software v12.1.1.12 (Artec 3D, Luxembourg, Luxembourg). In addition, four  
501 skulls were digitized with a photogrammetric approach, similar to that described in (Evin et al.  
502 2016). In brief, hundred pictures per sample were taken on different angles and inclinations  
503 with a Nikon D3300 camera equipped with an AF-S Micro Nikkor 85mm lens (Nikon, Tokyo,  
504 Japan) and a self-made fully automatic turntable. Then 3D models were reconstructed with the  
505 ReCap Photo software (Autodesk, San Rafael, CA, USA). Previous studies indicated no  
506 significant differences between 3D models obtained with three-dimensional scanners or  
507 photogrammetry (Evin et al. 2016; Fau et al. 2016). Both approaches are comparable in terms  
508 of measurement error (less than 1 mm). Bone surfaces were extracted as meshes and geometric  
509 inconsistencies (i.e. noise, holes) were cleaned using Geomagic software (3D Systems, Rock  
510 Hill, USA).

511 *Shape analyses.* 116 3D landmarks and sliding semi-landmarks were placed on each specimen  
512 by the same operator using the IDAV Landmark software (Wiley et al. 2005) v3.0. Out of them  
513 16 were anatomical landmarks, and 100 were sliding semi-landmarks individually placed  
514 around the basis of the horns on the suture between the bony core and the frontal bone. On each  
515 side, the first of these 50 sliding semi-landmarks was placed on the upper horn, at the  
516 intersection between the upper ridge of the bony core and the suture previously mentioned.  
517 Details on landmark locations on polycerate and wild type specimens are provided in  
518 **Supplementary Table 11** and **Supplementary Fig. 11**.

519 Following the procedure detailed by (Botton-Divet et al. 2015), a template was created using  
520 the specimen 2000-438 on which all anatomical landmarks and surface sliding semi-landmarks  
521 were placed. Then, a semi-automatic point placement was performed (Gunz and Mitteroecker  
522 2013) to project sliding semi-landmarks on the surface of the other 3D digitized skulls. Sliding  
523 semi-landmarks on surfaces and curves were allowed to slide in order to minimize the bending  
524 energy of a thin plate spline (TPS) between each 3D meshes and the template. After this first

525 TPS relaxation using the template, three iterative relaxations were performed using the  
526 Procrustes consensus of the previous step as a reference.

527 To remove non-shape variation (i.e. differences in position, scale, and orientation of the  
528 configurations) and provide optimal comparability between the specimens, we performed a  
529 generalized Procrustes Analysis (GPA) (Rohlf and Slice 1990). Since our dataset contained  
530 more variables than observations, we performed a Principal Component Analysis (PCA) on the  
531 procrustes residuals to reduce dimensionality, as recommended by (Gunz and Mitteroecker  
532 2013), and plotted the first Principal Components (PCs) to visualize the specimen distribution  
533 in the morphospace. In addition, the mean shape of our sample was used to compute theoretical  
534 shapes associated with the maximum and minimum of both sides of the first PC axis for each  
535 species using thin plate spline. GPA, PCA and shape computations were done using the  
536 ‘Morpho’ and ‘geomorph’ packages (Adams and Otárola-Castillo 2013; Adams et al. 2018;  
537 Schlager 2018) in the R environment (R Core Team 2018).

538 *Repeatability and reproducibility of landmark placement.* The 116 landmarks and sliding semi-  
539 landmarks were placed ten times independently on the skulls from two polycerate and two  
540 control male sheep sampled between 1852 and 1909 in Tunisia (A-12130, A12132, 1909-4)  
541 and neighboring Algeria (A12157; see **Supplementary Table 10**). The measurements were  
542 superimposed using a GPA and analyzed using a PCA. Since the variation within specimens  
543 was clearly smaller than the variation between specimens (**Supplementary Fig. 12**), we  
544 considered that the 116 landmarks and sliding semi-landmarks were precise enough to describe  
545 shape variation.

## 546 **Data Availability**

547 Raw sequencing data that support the findings of this study have been deposited to the European  
548 Variation Archive (EVA, <https://www.ebi.ac.uk/eva/>) under accession number PRJEB39341.  
549 Sequences from previous studies can be found at the following URL  
550 ([www.goatgenome.org/vargoats\\_data\\_access.htm](http://www.goatgenome.org/vargoats_data_access.htm)) or in the NCBI BioProject and EVA  
551 databases under accession numbers PRJEB6025, PRJEB6495, PRJEB9911, PRJEB14098,  
552 PRJEB14418, PRJEB15642, PRJEB23437, PRJEB31241, PRJEB31930, PRJEB32110,  
553 PRJEB35553, PRJEB35682, PRJEB37460, PRJEB39341, PRJEB39341 and PRJNA624020.  
554 Illumina GoatSNP50 Beadchip genotyping data generated for this study have been deposited in  
555 the Dryad Digital Repository (doi: 10.5061/dryad.rxdbrv6n). Illumina OvineHD Beadchip  
556 genotyping data from previous studies can be found in the same repository (doi:

557 10.5061/dryad.6t34b and 10.5061/dryad.1p7sf). Coordinates of landmarks and source data  
558 underlying Fig. 3 and 4, and Suppl. Fig. 2, 10 and 11 are provided as a Source Data file.

## 559 **Acknowledgements**

560 We thank L. Orlando (Universities of Toulouse III, France and Copenhagen, Denmark) for  
561 tentatively extracting DNA from museum skull specimens, as well as C. Hozé, F. Lejuste and  
562 A Michenet (ALLICE), R. McCulloch (CSIRO), S. Chahory and C. Degueurce (ENVA), F.  
563 Andreoletti, M. Boussaha, J. Kergosien, D. Mauchand, M. Femenia, N. Perrot and M. Vilotte  
564 (INRAE), B. Camus-Allanic (LABOGENA DNA), J. Peters (LMU), C. Bens, A. Delapré and  
565 A. Verguin (MNHN), L. Ludes-Fraulob (MZS) and B. Mascrez (University of Geneva) for their  
566 assistance. We also thank the staff of the INRAE experimental unit UE 1298 SAAJ for animal  
567 husbandry and management, as well as breeders and zoological parks for making animals  
568 available for sampling and for providing pictures. Contributors include in particular the  
569 Capgènes breeding company (France), L. Pachot (Mouton Village, Vasles, France), A.  
570 Archiloque (France), L. Fiorenzi (Az. Agr. Madonna delle Alpi, Italy), the Schafzuchtverein  
571 Jakobschaf Schweiz (Switzerland), Tierpark Hamm (Germany), A. Schumann (Germany) and  
572 Dr. A. Ennaifer (Zoological Park of Tunis, Tunisia). Finally, the authors thank the VarGoats  
573 Consortium for allowing variant filtering against their dataset. The Vargos project was  
574 supported by France Génomique (grant number ANR-10-INBS-0009). This work was  
575 supported by APIS-GENE (grant AKELOS) and the Swiss National Research Foundation  
576 (grant number No 310030B\_138662 to D.D.). A.Hi. was supported by a PhD fellowship from  
577 the University of Geneva.

## 578 **Authors contributions**

579 O.G., D.R., T.H., N.C., C.M.R., B.J.H and J.K. provided Illumina OvineHD Beadchip  
580 genotyping data and related phenotypes. A.C. mapped the ovine and caprine polycerate loci.  
581 C.Dr., C.D.-B., D.B., I.M, L.P., O.G., T.H., G.B., F.M., N.H., J.P., S.B.J., J.H., R.R., I.P.,  
582 J.A.L., L.G., D.R., E.V.M.-K., N.C., B.J.H, J.K. and G.T.-K. provided samples and phenotypes.  
583 D.E. and C.Do. performed whole genome sequencing from one polycerate Provençale goat and  
584 one polycerate Jacob sheep. G.T.-K. provided control whole genome sequences from sheep and  
585 goats. A.C., P.B., and M.N.-S. performed variant calling, annotation and screening for  
586 candidate variants. A.C. and A.A.-B. analysed sequence conservation and annotated the gene  
587 content of the mapping intervals. M.-C.D., C.Gr. and A.Hi. extracted DNA. M.-C.D., A.C.,  
588 C.Gr., and A.Hi. performed PCR for Sanger sequencing and for genotyping by PCR and

589 electrophoresis or PCR and Sanger sequencing. A.P. performed FISH analysis. A.Hi., J.Z and  
590 D.D. produced and studied mouse models. E.P. provided access to laboratory and experimental  
591 farm facilities. A.C., A.A.-B., M.-C.D., C.Gr. and E.P. sampled ovine and caprine fetuses. A.A.-  
592 B. and M.-C.D. extracted RNA, performed qRT-PCR and analysed the results. A.Bo., J.R.,  
593 A.C., A.A.-B. and M.-C.D. performed histological analyses. A.C., M.S. and A.Ha. performed  
594 3D data acquisition of skulls. A.Bl. provided access to a light scanner for 3D data acquisition.  
595 O.P., J.L., R.S., M.-D.W., R.-M.A. and C.Gu. provided access to skull specimens and related  
596 information. A.C. performed morphometric analyses. R.C. provided software and expertise in  
597 morphometric analyses. A.C. (Bovidae) and D.D. (mouse) designed the studies and wrote the  
598 manuscript, which was accepted or revised by all authors.

## 599 **Figure Legends**

600 **Figure 1. Polyceraty in sheep and goats and candidate genetic variants.** a) Polycerate Manx  
601 Loaghtan ram. b) Wildtype and polycerate male goats from a local German population. These  
602 individuals represent the most common phenotype. Polycerate animals with asymmetric horns  
603 and partial fusion of lateral horns are also regularly observed. c) A 4bp deletion causing  
604 polyceraty in sheep. Integrative Genome Viewer (IGV) screenshot with the localization of the  
605 variant with respect to *HOXD1*. Below is a graphical representation of nucleotide conservation  
606 at the exon 1-intron junction across 103 sarcopterigian and tetrapod species. d) Plot of read  
607 coverage in a heterozygous polycerate goat animal carrying a deletion of 503 kb downstream  
608 the *HOXD* gene cluster on Chr2 and a duplication of 137 kb on Chr5. e) FISH-mapping in a  
609 heterozygous polycerate goat with BAC clones corresponding to the region deleted in Chr2  
610 (labeled in red) and to the segment of Chr5 inserted at the deletion site (labeled in green).  
611 Magnification: X1000. Sheep and goat icons were made by ‘Monkik’ from  
612 [www.thenounproject.com](http://www.thenounproject.com).

613 **Figure 2. Regulation of *Hoxd1* expression pattern in crest cell-derived head structures in**  
614 **mouse.** a) On top is the structure of the mouse *HoxD* gene cluster with arrows showing the  
615 timing and localisation of gene expression along the body axis during development. The  
616 position of *Hoxd1* is highlighted in red. Below is a 1 Mb view of the locus, with *Hoxd1* in red  
617 as well as the relative position of the *POLYCERATE* variants in sheep (black arrowhead) and  
618 goat (black line). Below are depicted the various murine alleles, with the *lacZ* insertion in  
619 *Hoxd1* (blue arrowhead), the two BAC clones (thick blue lines) and the engineered deletion  
620 (black line). b) Fetal heads of E12.5-E13.5 mouse fetuses after X-gal staining. The dashed circle  
621 highlights the absence of *Hoxd1* expression in the crown (corresponding to the localization of

622 hornbuds in Bovidae), whereas the surrounding dermal cells are positive. The conservation of  
623 *Hoxd1* expression in the back of the neck (black arrows) contrasts with the presence/absence of  
624 expression in the facial muscle precursors (white arrows) and in the eyelids (arrowhead). The  
625 comparison between the four strains indicate that *Hoxd1* expression in all these cranial  
626 derivatives is controlled by regulatory elements located in a region orthologous to the proximal  
627 portion of the segment deleted in polycerate goats.

628 **Figure 3. RT-qPCR gene expression analyses in sheep and goat fetuses.** a, b) Schemes of  
629 the tissues sampled at stage 70 dpc in goat (a) and 76 dpc in sheep (b) in four control (+/+) and  
630 four heterozygous (+/-) polycerate fetuses within each species. bs: skin from the back of the  
631 head; hb: skin from the hornbud; h1: skin from the lower horn bud; and h2: skin from the upper  
632 horn bud in polycerate specimens; fs: frontal skin; el: eyelids. RT-qPCR gene expression  
633 analyses in these tissues are shown below (means and standard errors of the means). \*:  $p < 0.05$ ,  
634 \*\*:  $p < 0.01$  (Welch two sample t-test with the alternative hypothesis that the means are not  
635 equal). For the sake of clarity, the symbols # and @ were also used to show significant  
636 differences ( $p < 0.05$ ) between distant bars.

637 **Figure 4. Results of three-dimensional geometric morphometric analyses of 61 ovine and**  
638 **19 caprine skulls.** a) Distribution of the specimens along the first two axes of the PCA. The  
639 proportion of variance explained by the main principal components is indicated on each axis.  
640 Green dots: polycerate sheep with a distance between lateral horns (dlh) larger than the distance  
641 between upper horns (duh); light blue: polycerate sheep with a  $dlh \leq duh$ ; blue: polycerate sheep  
642 with at least two lateral horns partially fused at their basis; purple: wild type sheep; black:  
643 polycerate goats; and red: wild type goats. Representative specimens illustrate each cluster and  
644 symbols are used to indicate their respective locations in the PCA analysis (see **Suppl. Fig. 10**  
645 for intraspecies analyses and further information). b) Number of heterozygous (+/-) and  
646 homozygous (-/-) polycerate rams amongst groups of live animals with different dlhl (dlh on  
647 the left side) and duh relative sizes (see **Suppl. Table 12** for further information); \*\*\*:  $p$ -value=  
648  $3.5 \times 10^{-7}$  (Fisher's exact test). c) Theoretical shapes associated with the maximum (upper three)  
649 and minimum values (lower three) of PC1 axis for a sheep skull. Red dots correspond to  
650 anatomical landmarks while the other dots correspond to sliding semi-landmarks; light blue and  
651 purple dots highlight the sites of division of lateral horns. d) Shape differences for the sliding  
652 semi-landmarks located at the basis of the left horn. Light blue and purple dots correspond to  
653 the maximum and minimum values of PC1 axis, respectively. Dashed squares indicate the

654 estimated position of dissected tissues in **Fig. 3** (bs: skin from the back of the head; fs: frontal  
655 skin) in which *HOXD1* expression was observed in fetuses.

## 656 References

- 657 Adams DC, Collyer M, Kaliontzopoulou A. 2018. Geometric Morphometric Analyses of  
658 2D/3D Landmark Data. Available from:  
659 <http://kambing.ui.ac.id/cran/web/packages/geomorph/geomorph.pdf>.
- 660 Adams DC, Otárola-Castillo E. 2013. geomorph: an r package for the collection and analysis  
661 of geometric morphometric shape data. Paradis E, editor. *Methods Ecol Evol* 4:393–399.
- 662 Allais-Bonnet A, Grohs C, Medugorac I, Krebs S, Djari A, Graf A, Fritz S, Seichter D, Baur A,  
663 Russ I, et al. 2013. Novel Insights into the Bovine Polled Phenotype and Horn  
664 Ontogenesis in Bovidae. Yue J, editor. *PLoS ONE* 8:e63512.
- 665 Andrey G, Montavon T, Mascrez B, Gonzalez F, Noordermeer D, Leleu M, Trono D, Spitz F,  
666 Duboule D. 2013. A switch between topological domains underlies HoxD genes  
667 collinearity in mouse limbs. *Science* 340:1234167.
- 668 Bickhart DM, Rosen BD, Koren S, Sayre BL, Hastie AR, Chan S, Lee J, Lam ET, Liachko I,  
669 Sullivan ST, et al. 2017. Single-molecule sequencing and chromatin conformation  
670 capture enable de novo reference assembly of the domestic goat genome. *Nature*  
671 *Genetics* 49:643–650.
- 672 Botton-Divet L, Houssaye A, Herrel A, Fabre A-C, Cornette R. 2015. Tools for quantitative  
673 form description; an evaluation of different software packages for semi-landmark  
674 analysis. *PeerJ* 3:e1417.
- 675 Capitan A, Allais-Bonnet A, Pinton A, Marquant-Le Guienne B, Le Bourhis D, Grohs C, Bouet  
676 S, Clément L, Salas-Cortes L, Venot E, et al. 2012. A 3.7 Mb Deletion Encompassing  
677 ZEB2 Causes a Novel Polled and Multisystemic Syndrome in the Progeny of a Somatic  
678 Mosaic Bull. Yue J, editor. *PLoS ONE* 7:e49084.
- 679 Capitan A, Grohs C, Weiss B, Rossignol M-N, Reversé P, Eggen A. 2011. A Newly Described  
680 Bovine Type 2 Scurs Syndrome Segregates with a Frame-Shift Mutation in  
681 TWIST1. Toland AE, editor. *PLoS ONE* 6:e22242.
- 682 Crooks GE. 2004. WebLogo: A Sequence Logo Generator. *Genome Research* 14:1188–1190.
- 683 Davis EB, Brakora KA, Lee AH. 2011. Evolution of ruminant headgear: a review. *Proc. R. Soc.*  
684 *B.* 278:2857–2865.
- 685 Dove WF. 1935. The physiology of horn growth: a study of the morphogenesis, the interaction  
686 of tissues and the evolutionary processes of a Mendelian recessive character by means  
687 of transplantation of tissues. *Journal of Experimental Zoology*:347–405.
- 688 Ducos A, Dumont P, Séguéla A, Pinton A, Berland H, Brun-Baronnat C, Darré A, Marquant-  
689 Le Guienne B, Humblot P, Boichard D, et al. 2000. A new reciprocal translocation in a  
690 subfertile bull. *Genetics, selection, evolution: GSE* 32:589–598.

- 691 Durkin K, Coppieters W, Drögemüller C, Ahariz N, Cambisano N, Druet T, Fasquelle C, Haile  
692 A, Horin P, Huang L, et al. 2012. Serial translocation by means of circular intermediates  
693 underlies colour sidedness in cattle. *Nature* 482:81–84.
- 694 Eggen A, Gautier M, Billaut A, Petit E, Hayes H, Laurent P, Urban C, Pfister-Genskow M,  
695 Eilertsen K, Bishop MD. 2001. Construction and characterization of a bovine BAC  
696 library with four genome-equivalent coverage. *Genetics, selection, evolution: GSE*  
697 33:543–548.
- 698 Epstein H. 1971. The origin of the domesticated animals of Africa. Africana Publishing  
699 Corporation. New York
- 700 Evin A, Souter T, Hulme-Beaman A, Ameen C, Allen R, Viacava P, Larson G, Cucchi T,  
701 Dobney K. 2016. The use of close-range photogrammetry in zooarchaeology: Creating  
702 accurate 3D models of wolf crania to study dog domestication. *Journal of*  
703 *Archaeological Science: Reports* 9:87–93.
- 704 Fau M, Cornette R, Houssaye A. 2016. Photogrammetry for 3D digitizing bones of mounted  
705 skeletons: Potential and limits. *Comptes Rendus Palevol* 15:968–977.
- 706 Frohman MA, Martin GR. 1992. Isolation and analysis of embryonic expression of Hox-4.9, a  
707 member of the murine labial-like gene family. *Mechanisms of Development* 38:55–67.
- 708 Gregory SG, Sekhon M, Schein J, Zhao S, Osoegawa K, Scott CE, Evans RS, BurrIDGE PW,  
709 Cox TV, Fox CA, et al. 2002. A physical map of the mouse genome. *Nature* 418:743–  
710 750.
- 711 Greyvenstein OFC, Reich CM, van Marle-Koster E, Riley DG, Hayes BJ. 2016. Polyceraty  
712 (multi-horns) in Damara sheep maps to ovine chromosome 2. *Anim Genet* 47:263–266.
- 713 Groves C. 2003. Taxonomy of ungulates of the Indian subcontinent. *Journal of the Bombay*  
714 *Natural History Society*:314–362.
- 715 Gunz P, Mitteroecker P. 2013. SEMILANDMARKS: A METHOD FOR QUANTIFYING  
716 CURVES AND SURFACES. *Hystrix, the Italian Journal of Mammalogy* [Internet] 24.  
717 Available from: <https://doi.org/10.4404/hystrix-24.1-6292>
- 718 He X, Zhou Z, Pu Y, Chen X, Ma Y, Jiang L. 2016. Mapping the four-horned locus and testing  
719 the polled locus in three Chinese sheep breeds. *Anim Genet* 47:623–627.
- 720 Heitzmann A. 2006. Trianon, la ferme du Hameau. *Versalia*:114–129.
- 721 Hellemans J, Mortier G, De Paepe A, Speleman F, Vandesompele J. 2007. qBase relative  
722 quantification framework and software for management and automated analysis of real-  
723 time quantitative PCR data[No title found]. *Genome Biol* 8:R19.
- 724 Kijas JW, Hadfield T, Naval Sanchez M, Cockett N. 2016. Genome-wide association reveals  
725 the locus responsible for four-horned ruminant. *Anim Genet* 47:258–262.
- 726 Kmita M, Duboule D. 2003. Organizing axes in time and space; 25 years of colinear tinkering.  
727 *Science* 301:331–333.
- 728 Krumlauf R. 1994. Hox genes in vertebrate development. *Cell* 78:191–201.

- 729 Li H, Durbin R. 2009. Fast and accurate short read alignment with Burrows-Wheeler transform.  
730 *Bioinformatics (Oxford, England)* 25:1754–1760.
- 731 Li H, Handsaker B, Wysoker A, Fennell T, Ruan J, Homer N, Marth G, Abecasis G, Durbin R,  
732 Genome Project Data Processing S. 2009. The Sequence Alignment/Map format and  
733 SAMtools. *Bioinformatics* 25:2078–2079.
- 734 Lincoln GA. 1973. Appearance of antler pedicles in early foetal life in red deer. *Journal of*  
735 *Embryology and Experimental Morphology* 29:431–437.
- 736 McKenna A, Hanna M, Banks E, Sivachenko A, Cibulskis K, Kernytsky A, Garimella K,  
737 Altshuler D, Gabriel S, Daly M, et al. 2010. The Genome Analysis Toolkit: a  
738 MapReduce framework for analyzing next-generation DNA sequencing data. *Genome*  
739 *Research* 20:1297–1303.
- 740 Putelat O. 2005. Le bestiaire polycère. *Revue de Paléobiologie*:293–301.
- 741 R Core Team. 2018. R: a language and environment for statistical computing. R foundation for  
742 statistical computing, Vienne. Available from: <https://www.R-project.org/>
- 743 Ren X, Yang G-L, Peng W-F, Zhao Y-X, Zhang M, Chen Z-H, Wu F-A, Kantanen J, Shen M,  
744 Li M-H. 2016. A genome-wide association study identifies a genomic region for the  
745 polycerate phenotype in sheep (*Ovis aries*). *Sci Rep* 6:21111.
- 746 Rohlf FJ, Slice D. 1990. Extensions of the Procrustes Method for the Optimal Superimposition  
747 of Landmarks. *Systematic Zoology* 39:40.
- 748 Rozen S, Skaletsky H. 1999. Primer3 on the WWW for General Users and for Biologist  
749 Programmers. In: *Bioinformatics Methods and Protocols*. Vol. 132. New Jersey:  
750 Humana Press. p. 365–386. Available from: [http://link.springer.com/10.1385/1-59259-](http://link.springer.com/10.1385/1-59259-192-2:365)  
751 [192-2:365](http://link.springer.com/10.1385/1-59259-192-2:365)
- 752 Schep R, Necsulea A, Rodriguez-Carballo E, Guerreiro I, Andrey G, Nguyen Huynh TH,  
753 Marcet V, Zakany J, Duboule D, Beccari L. 2016. Control of Hoxd gene transcription  
754 in the mammary bud by hijacking a preexisting regulatory landscape. *Proceedings of*  
755 *the National Academy of Sciences of the United States of America* 113:E7720–E7729.
- 756 Schlager S. 2018. Morpho: calculations and visualisations related to Geometric Morphometrics.  
757 Available from: <https://cran.r-project.org/web/packages/Morpho/Morpho.pdf>.
- 758 Thompson JD, Higgins DG, Gibson TJ. 1994. CLUSTAL W: improving the sensitivity of  
759 progressive multiple sequence alignment through sequence weighting, position-specific  
760 gap penalties and weight matrix choice. *Nucleic Acids Research* 22:4673–4680.
- 761 Thorvaldsdóttir H, Robinson JT, Mesirov JP. 2013. Integrative Genomics Viewer (IGV): high-  
762 performance genomics data visualization and exploration. *Briefings in Bioinformatics*  
763 14:178–192.
- 764 Tosser-Klopp G, Bardou P, Bouchez O, Cabau C, Crooijmans R, Dong Y, Donnadieu-Tonon  
765 C, Eggen A, Heuven HCM, Jamli S, et al. 2014. Design and Characterization of a 52K  
766 SNP Chip for Goats. Liu Z, editor. *PLoS ONE* 9:e86227.



- 767 Vandesompele J, De Preter K, Pattyn F, Poppe B, Van Roy N, De Paepe A, Speleman F. 2002.  
768 Accurate normalization of real-time quantitative RT-PCR data by geometric averaging  
769 of multiple internal control genes. *Genome Biology* 3:RESEARCH0034.
- 770 Wang Y, Zhang C, Wang N, Li Z, Heller R, Liu R, Zhao Y, Han J, Pan X, Zheng Z, et al. 2019.  
771 Genetic basis of ruminant headgear and rapid antler regeneration. *Science*  
772 364:eaav6335.
- 773 Weckx S, Del-Favero J, Rademakers R, Claes L, Cruts M, De Jonghe P, Van Broeckhoven C,  
774 De Rijk P. 2005. novoSNP, a novel computational tool for sequence variation discovery.  
775 *Genome Research* 15:436–442.
- 776 Wiley DF, Amenta N, Alcantara DA, Ghosh D, Kil YJ, Delson E, Harcourt-Smith W, Rohlf FJ,  
777 St. John K, Hamann B. 2005. Evolutionary Morphing. In: VIS 05. IEEE Visualization,  
778 2005. Minneapolis, MN, USA: IEEE. p. 431–438. Available from:  
779 <http://ieeexplore.ieee.org/document/1532826/>
- 780 Wilkins SJ, Yoong S, Verkade H, Mizoguchi T, Plowman SJ, Hancock JF, Kikuchi Y, Heath  
781 JK, Perkins AC. 2008. Mtx2 directs zebrafish morphogenetic movements during  
782 epiboly by regulating microfilament formation. *Developmental Biology* 314:12–22.
- 783 Ye K, Schulz MH, Long Q, Apweiler R, Ning Z. 2009. Pindel: a pattern growth approach to  
784 detect break points of large deletions and medium sized insertions from paired-end short  
785 reads. *Bioinformatics* 25:2865–2871.
- 786 Yerle M, Goureau A, Gellin J, Le Tissier P, Moran C. 1994. Rapid mapping of cosmid clones  
787 on pig chromosomes by fluorescence in situ hybridization. *Mammalian Genome:  
788 Official Journal of the International Mammalian Genome Society* 5:34–37.
- 789 Zakany J, Kmita M, Alarcon P, de la Pompa JL, Duboule D. 2001. Localized and transient  
790 transcription of Hox genes suggests a link between patterning and the segmentation  
791 clock. *Cell* 106:207–217.
- 792

## Allais-Bonnet et al., Figure 1

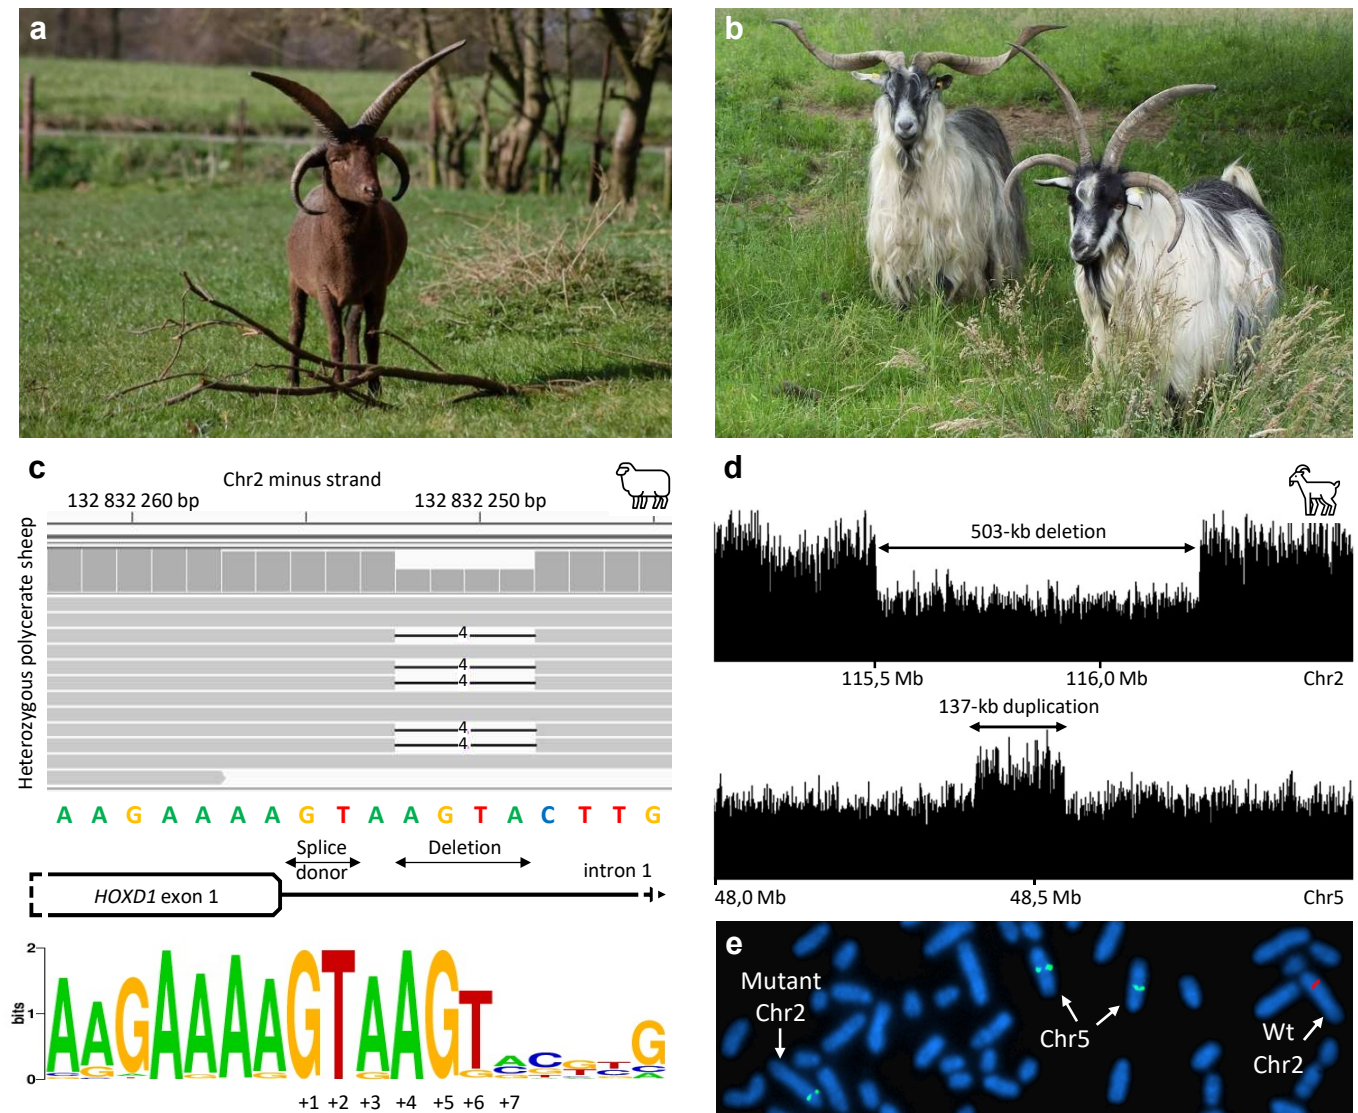

## Allais-Bonnet et al., Figure 2

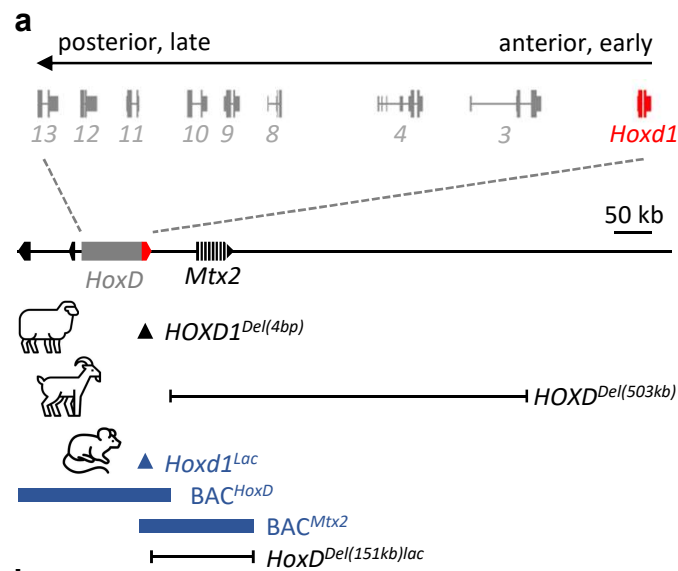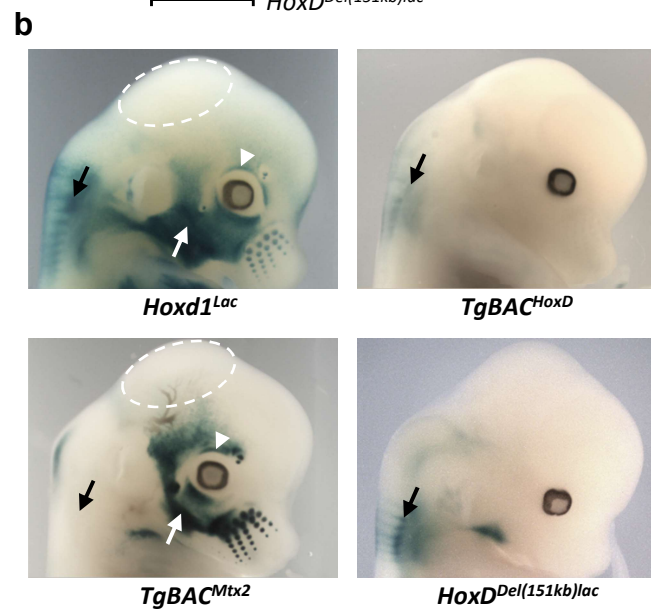

## Allais-Bonnet et al., Figure 3

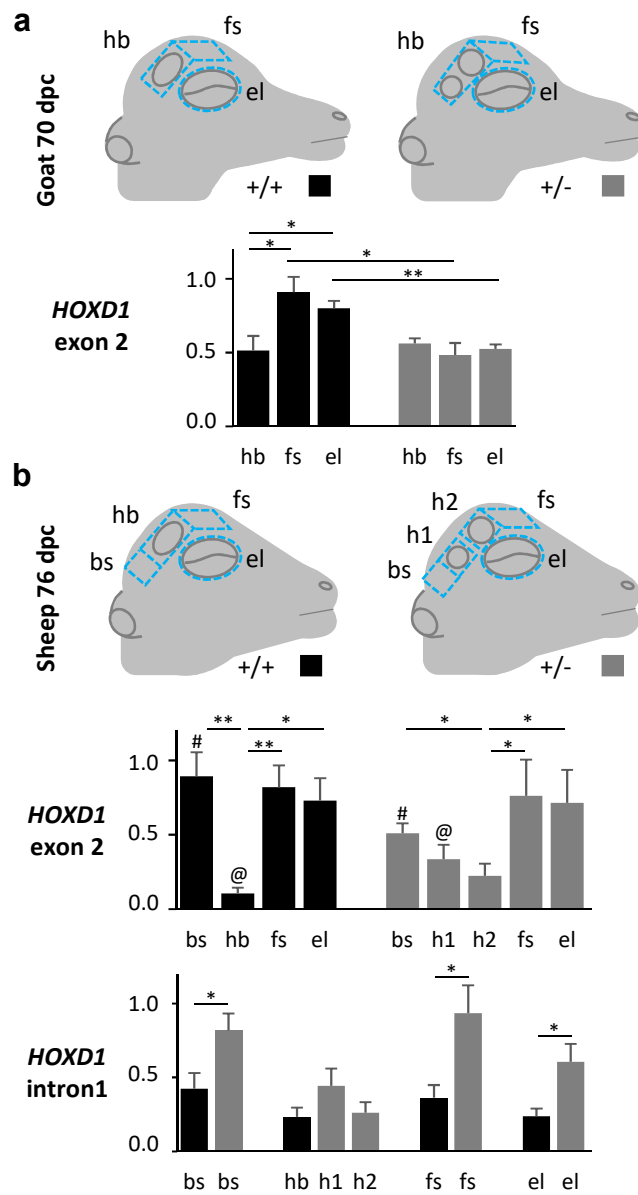

## Allais-Bonnet et al., Figure 4

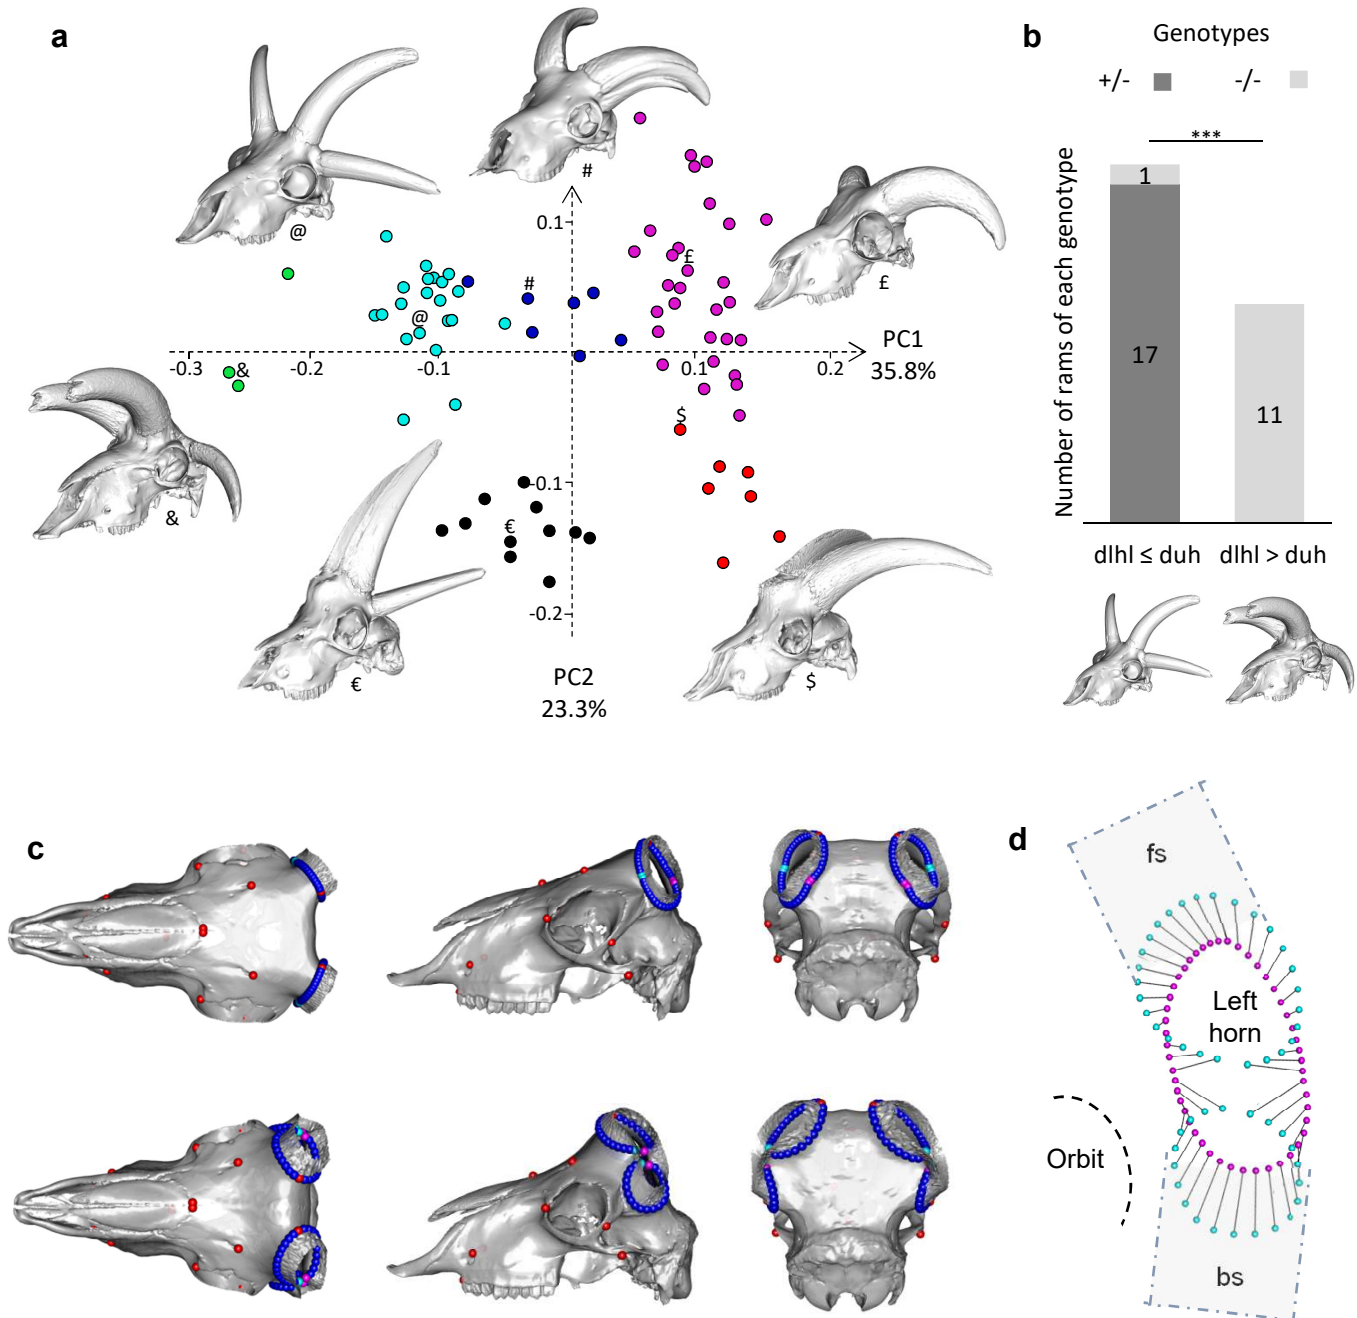

Source: https://www.biorxiv.org/content/biorxiv/early/2020/11/04/2020.11.04.363069.full.pdf
